# Supplementary material for: Selection and characterization of the target fault for fluid-induced activation and earthquake rupture experiments
Source: Copernicus journal article supplement (doi:10.5194/se-15-1087-2024), 2024-08-29
Supplement: Supplementary file 1 [file se-15-1087-2024-supplement.pdf]

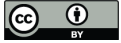

*Supplement of*

## **Selection and characterization of the target fault for fluid-induced activation and earthquake rupture experiments**

**Peter Ahtziger-Zupančič et al.**

*Correspondence to:* Peter Ahtziger-Zupančič ([peter.achtziger-zupancic@ieg.fraunhofer.de](mailto:peter.achtziger-zupancic@ieg.fraunhofer.de)) and Alba Simona Zappone ([alba.zappone@sed.eurfx.eu](mailto:alba.zappone@sed.eurfx.eu))

The copyright of individual parts of the supplement might differ from the article licence.

Abbreviations:

|                    |                                                                                             |
|--------------------|---------------------------------------------------------------------------------------------|
| ATV                | Acoustic televiewer                                                                         |
| BFE_A0X            | Borehole in the FEAR project_drilling series A; borehole number                             |
| BULGG              | Bedretto Underground Laboratory for Geosciences and Geoenergies                             |
| DEM                | digital elevation models                                                                    |
| F                  | Fault                                                                                       |
| F0 to 4            | Core Facies                                                                                 |
| FEAR               | Fault Activation and Earthquake Rupture                                                     |
| FZ                 | Fault Zone                                                                                  |
| DG, MC fault zones | project identification of the fault zones; MC FZ is the selected fault zone                 |
| GPR                | Ground penetrating radar                                                                    |
| JAGUARS            | Japanese-German Acoustic Emission Research in South Africa                                  |
| KURT               | KAERI Underground Research Tunnel                                                           |
| LIDAR              | laser imaging, detection, and ranging                                                       |
| OTV                | Optical televiewer                                                                          |
| TM                 | Tunnel Meter (of the Bedretto Tunnel starting with TM0 at the Ronco Portal/Bedretto Valley) |
| URL                | Underground RockLaboratory                                                                  |
